# Supplementary material for: Synthesis of BiOI/Bi4O5I2/Bi2O2CO3p–n–p heterojunctions with superior photocatalytic activities
Source: Royal Society of Chemistry journal article supplement (doi:10.1039/c5nj01662b), 2015-01-01
Supplement: c5nj01662b1.pdf [file c5nj01662b1.pdf]

## SUPPORTING INFORMATION

### Synthesis of BiOI/Bi<sub>4</sub>O<sub>5</sub>I<sub>2</sub>/Bi<sub>2</sub>O<sub>2</sub>CO<sub>3</sub> p-n-p heterojunctions with superior photocatalytic activities

Yin Peng\*<sup>†</sup>, Pian-Pian Yu<sup>†</sup>, Hai-Yan Zhou<sup>†</sup> and An-Wu Xu\*<sup>‡</sup>

<sup>†</sup>The Key Laboratory of Functional Molecular Solids, Ministry of Education, College of Chemistry and Materials Science, Anhui Normal University, Wuhu 241000, China.

<sup>‡</sup>Division of Nanomaterials and Chemistry, Hefei National Laboratory for Physical Sciences at Microscale, Department of Chemistry, University of Science and Technology of China, Hefei 230026, P. R China.

Fax: (+86) 551-6360 2346; E-mail: [anwuxu@ustc.edu.cn](mailto:anwuxu@ustc.edu.cn).

To be published in *New J Chem*.

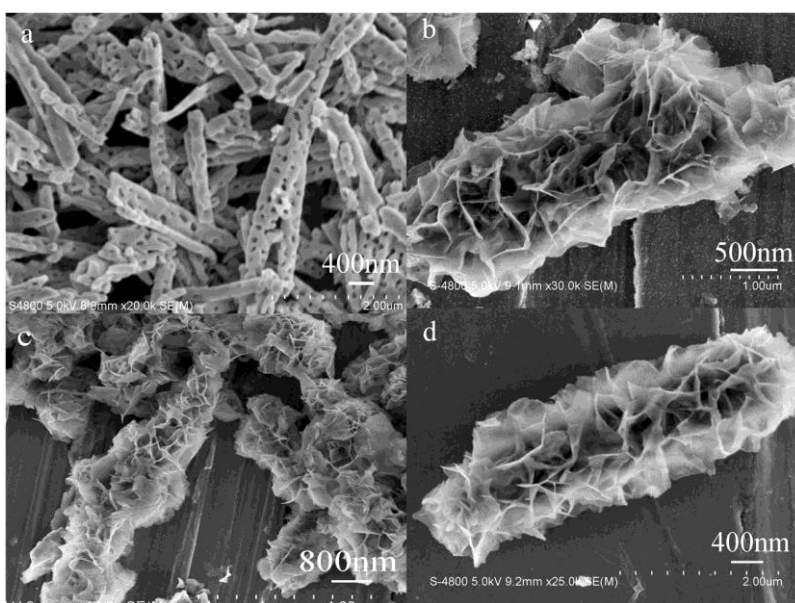

**Fig. S1** SEM images of pure (a) Bi<sub>2</sub>O<sub>3</sub> nanorods, (b) S1, (c) S2 and (d) S3 heterostructures.

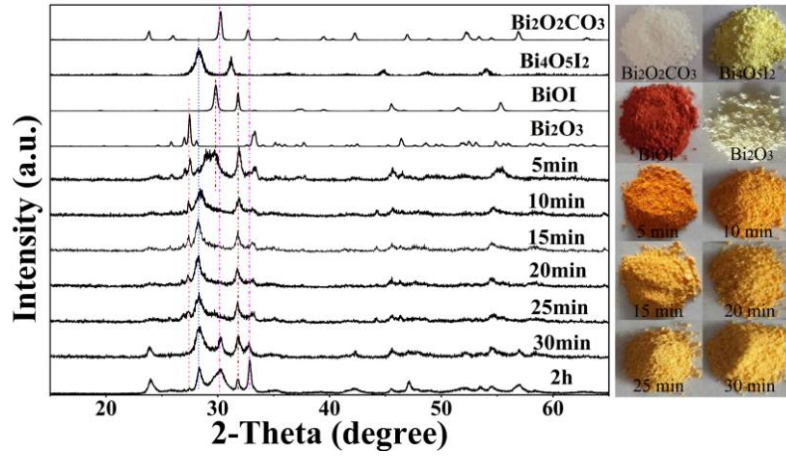

**Fig. S2** XRD patterns and the photographs of the obtained products at different reaction time.

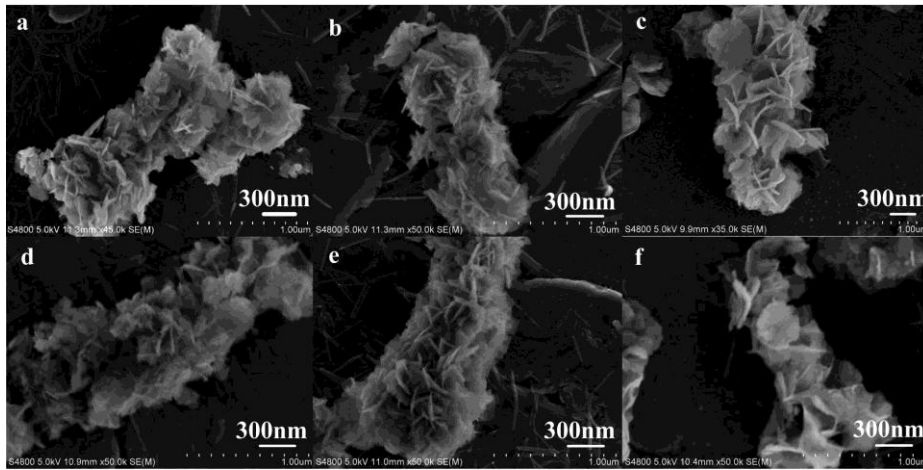

**Fig. S3** SEM images of the obtained products at different reaction time, (a) 5 min, (b) 10 min, (c) 15 min, (d) 20 min, (e) 25 min and (f) 30 min.

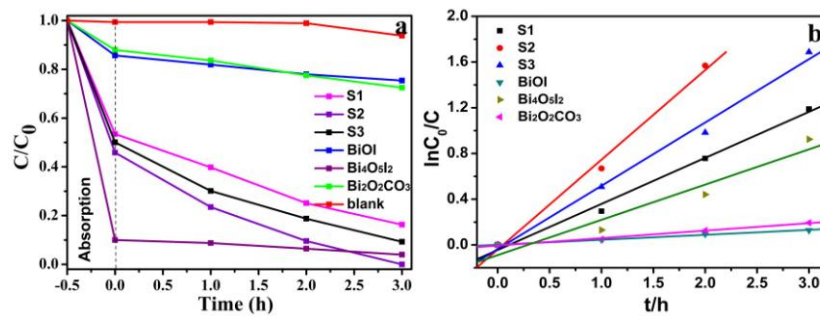

**Fig. S4** (a) The degradation curves of RhB (20 mg/L), (b) relevant degradation rates in the presence of as-prepared samples under visible light irradiation ( $\lambda \geq 400$  nm).

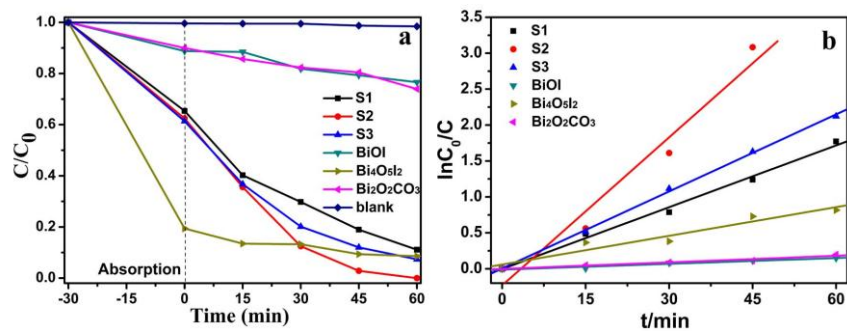

**Fig. S5** (a) The degradation curves of MB (20 mg/L), (b) relevant degradation rates in the presence of as-prepared samples under solar light irradiation.
